# Supplementary material
Source: Springer Nature journal article supplement (https://www.springermedizin.de/resource/supplementary/12985_2010_1075_MOESM5_ESM.pdf/9609090)

Chicken/NJ/15086-3/1994 H7N2

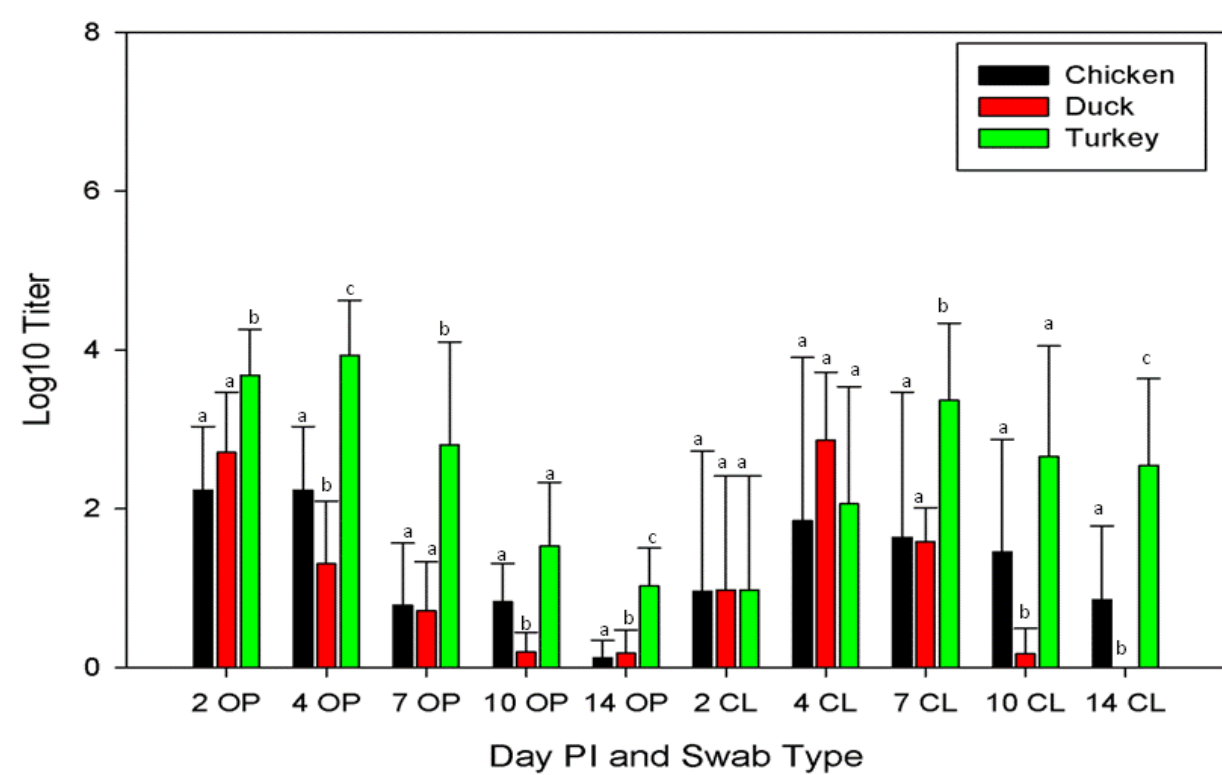

Turkey/NY/4450-4/1994

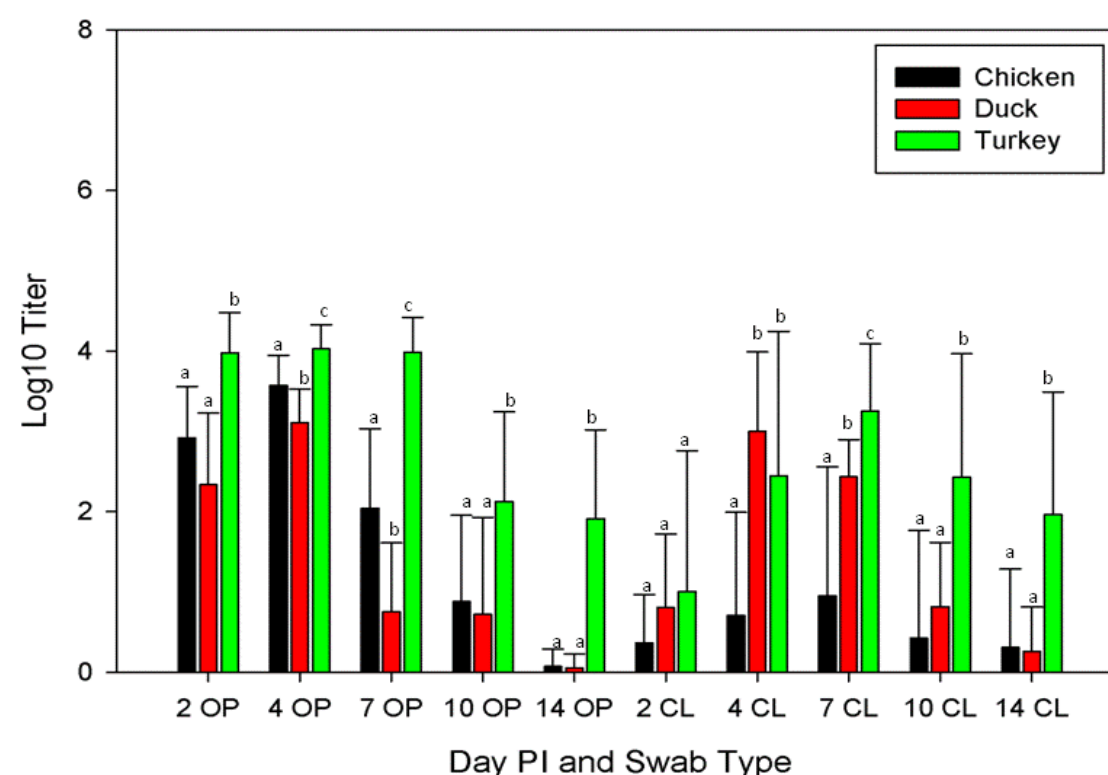

Chicken/NY/3112-1/1995

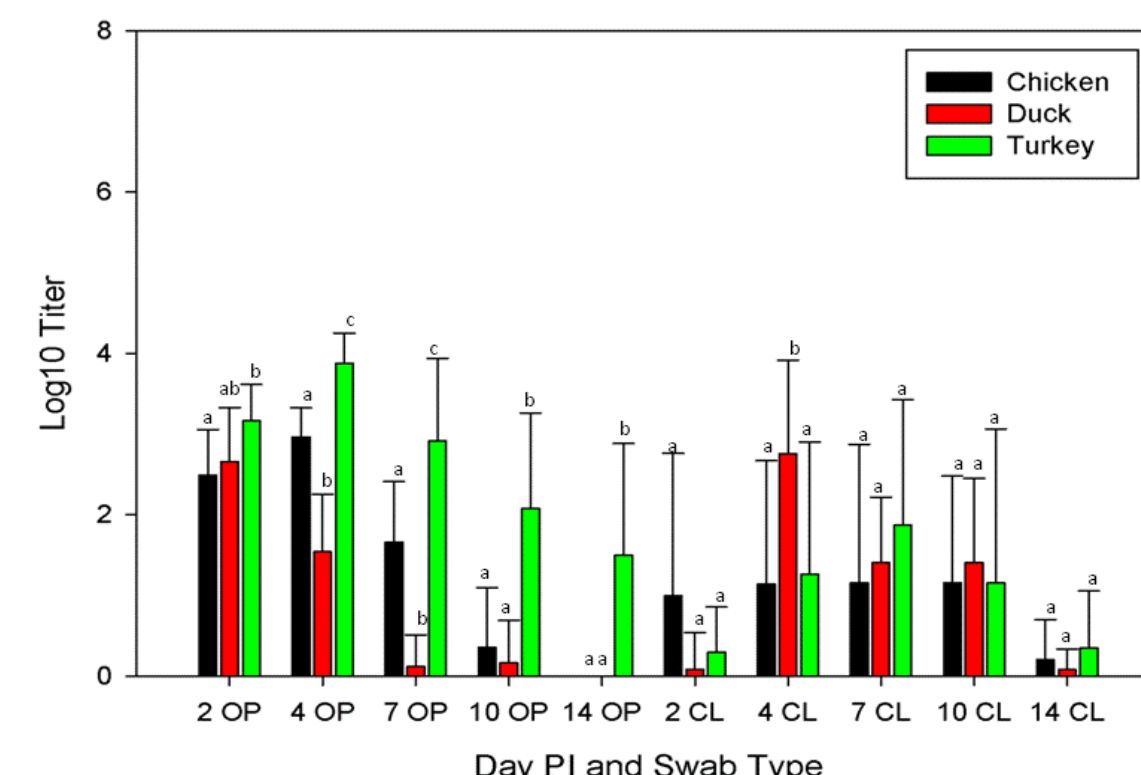

Chicken/NY/12273-11/99

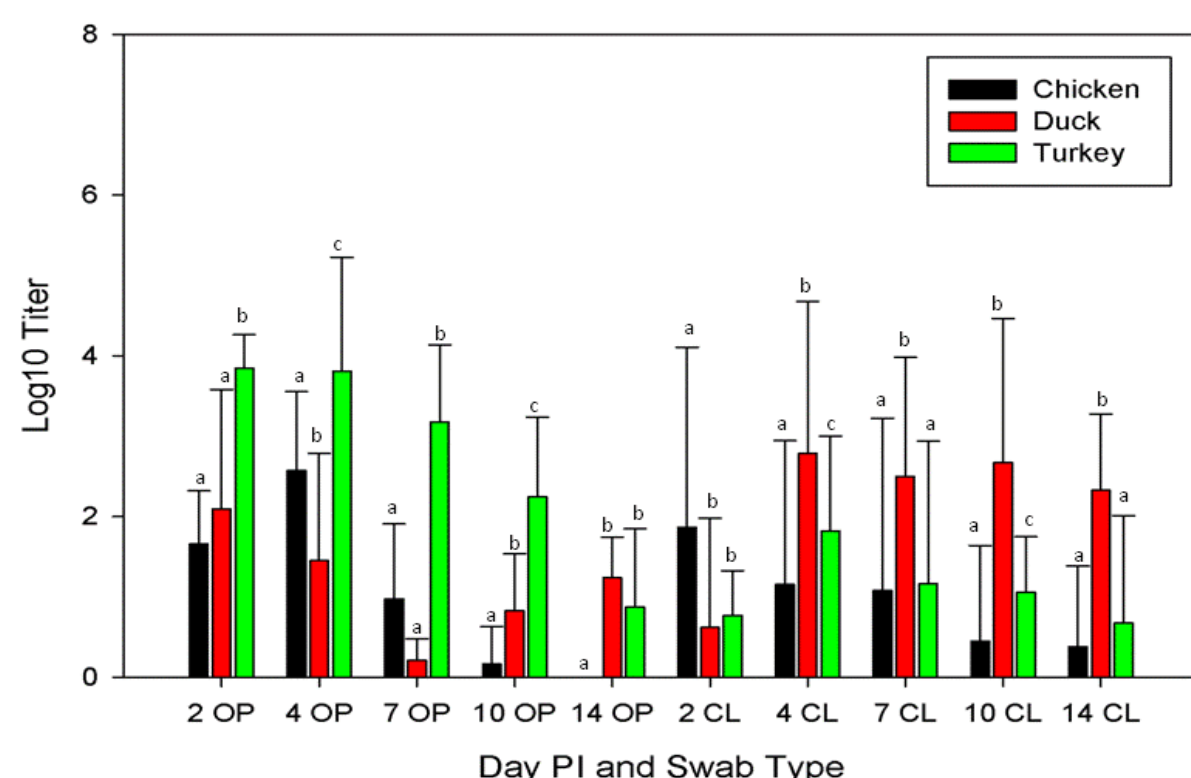

Chicken/NY/30749-3/2000

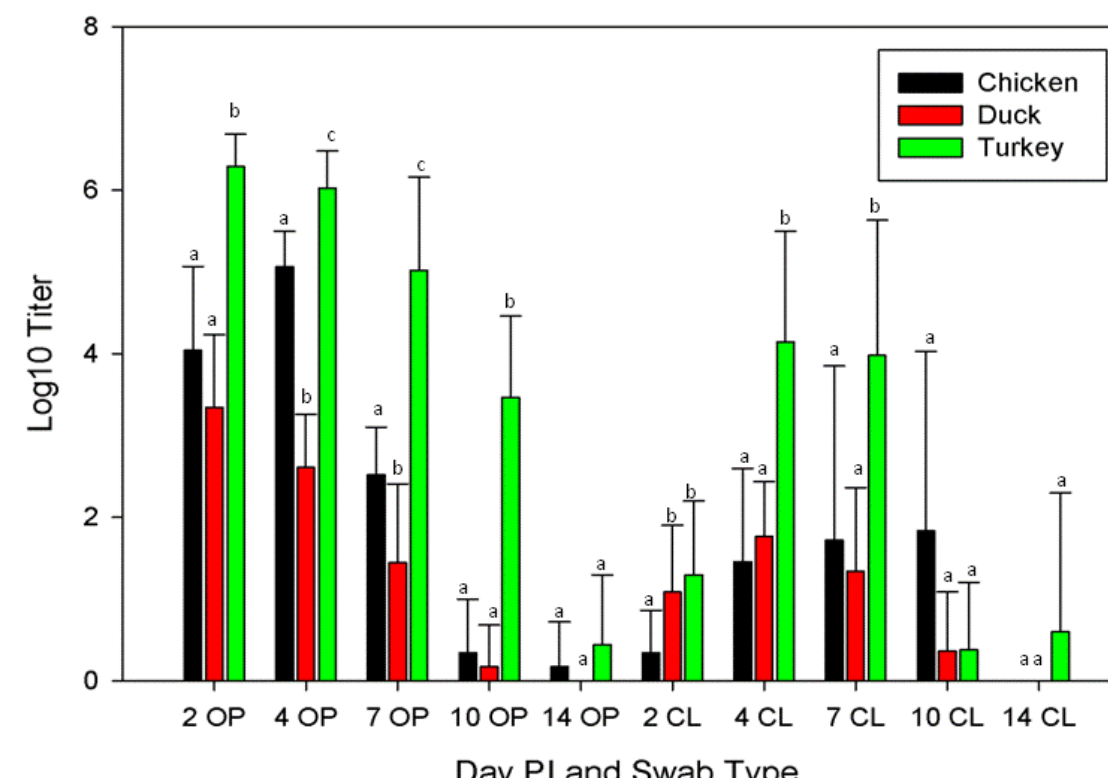

GuineaHen/MA/148081-11/2002

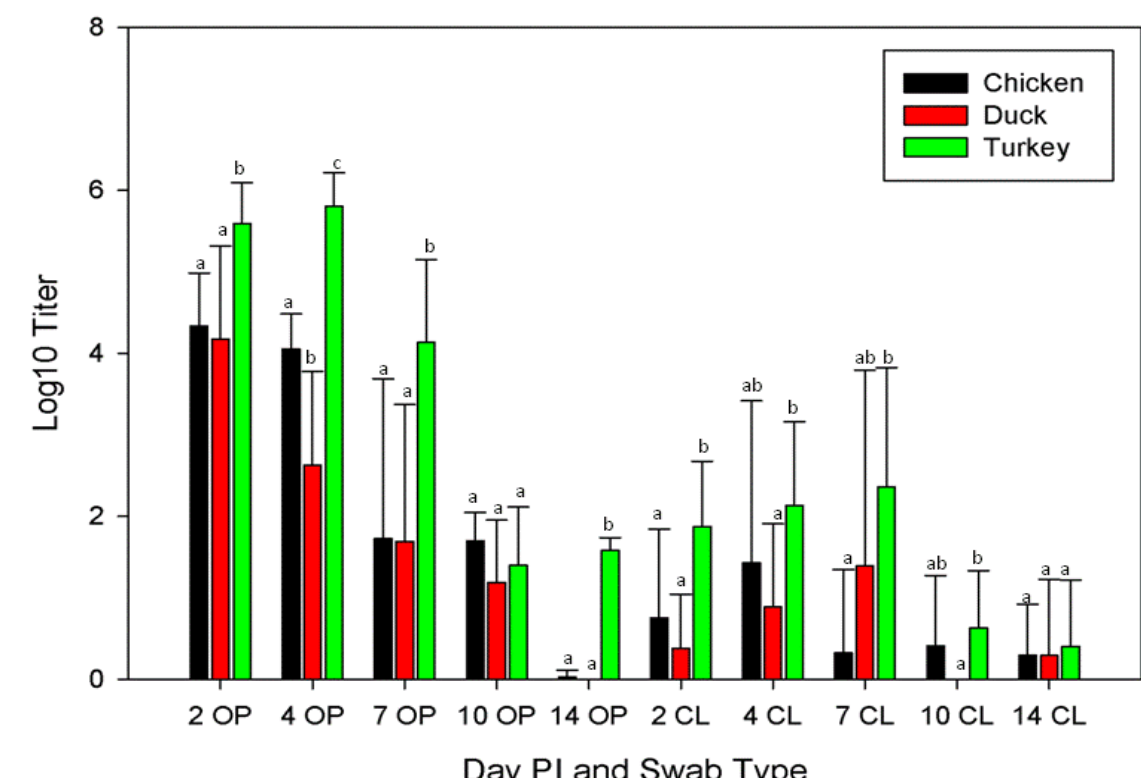

Chicken/PA/9801289/1998

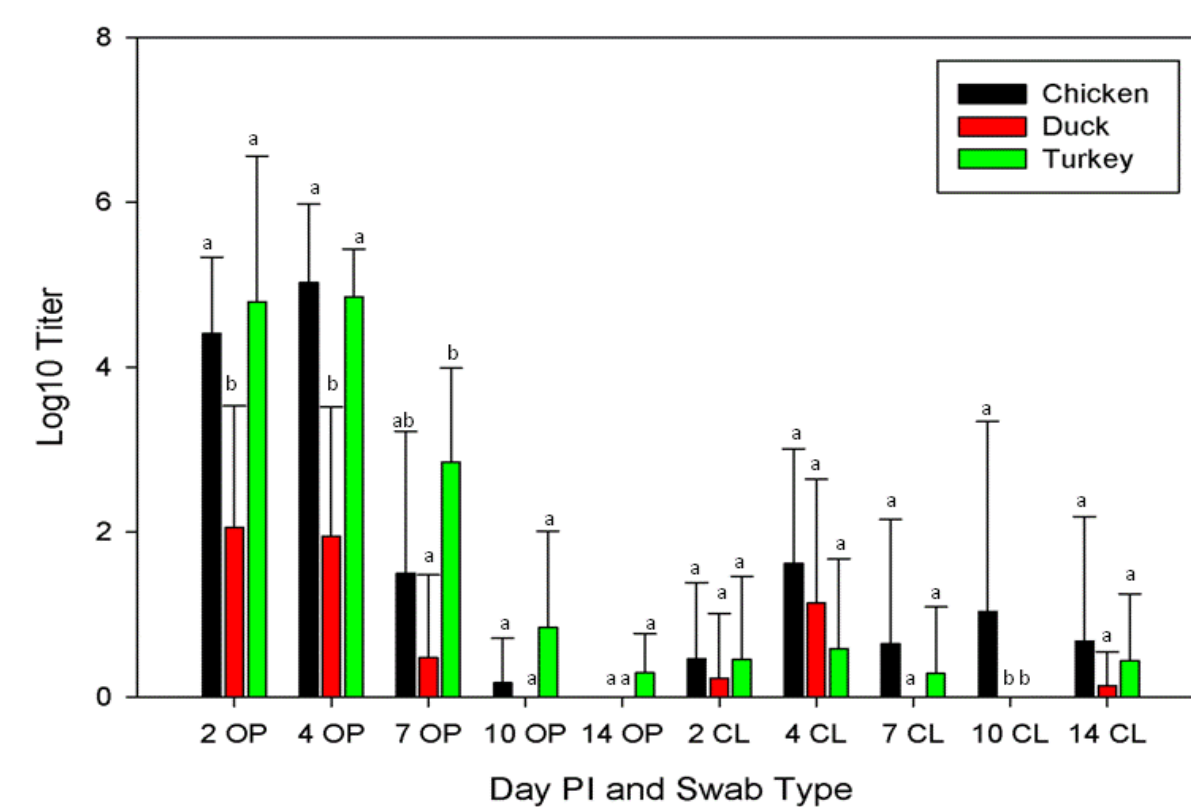

Turkey/VA/SEP-67/2002

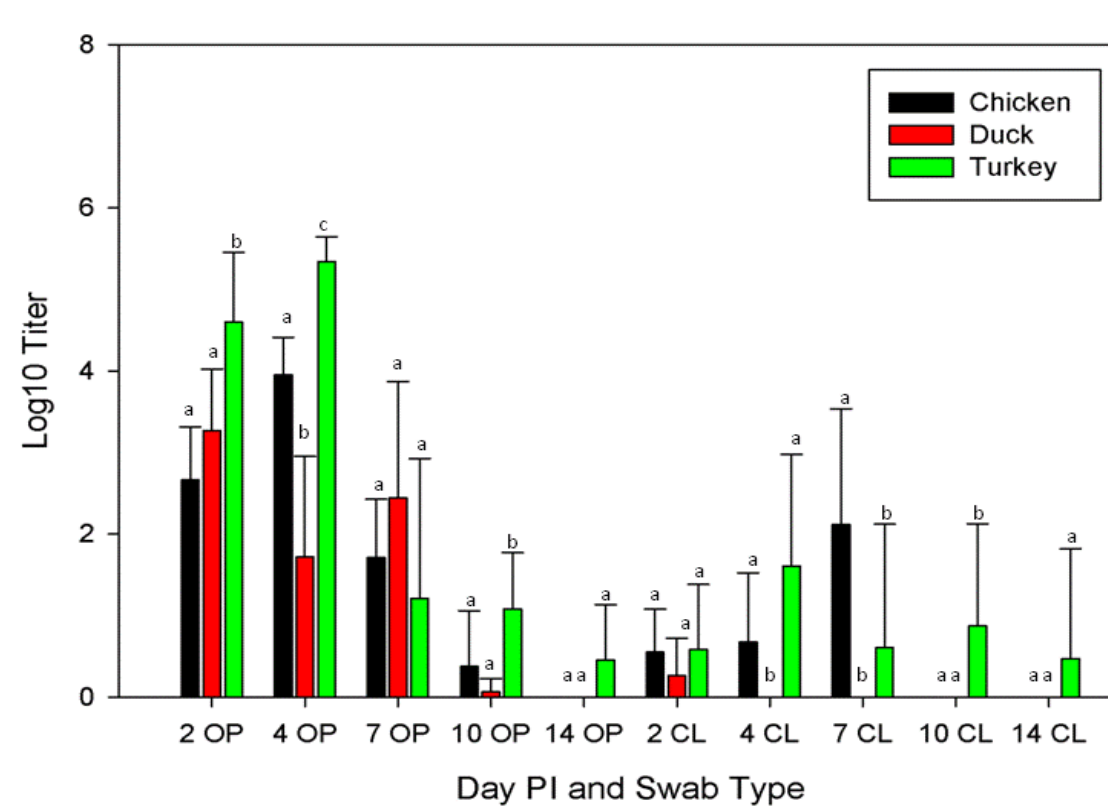

Chicken/MD/MinhMa/2004

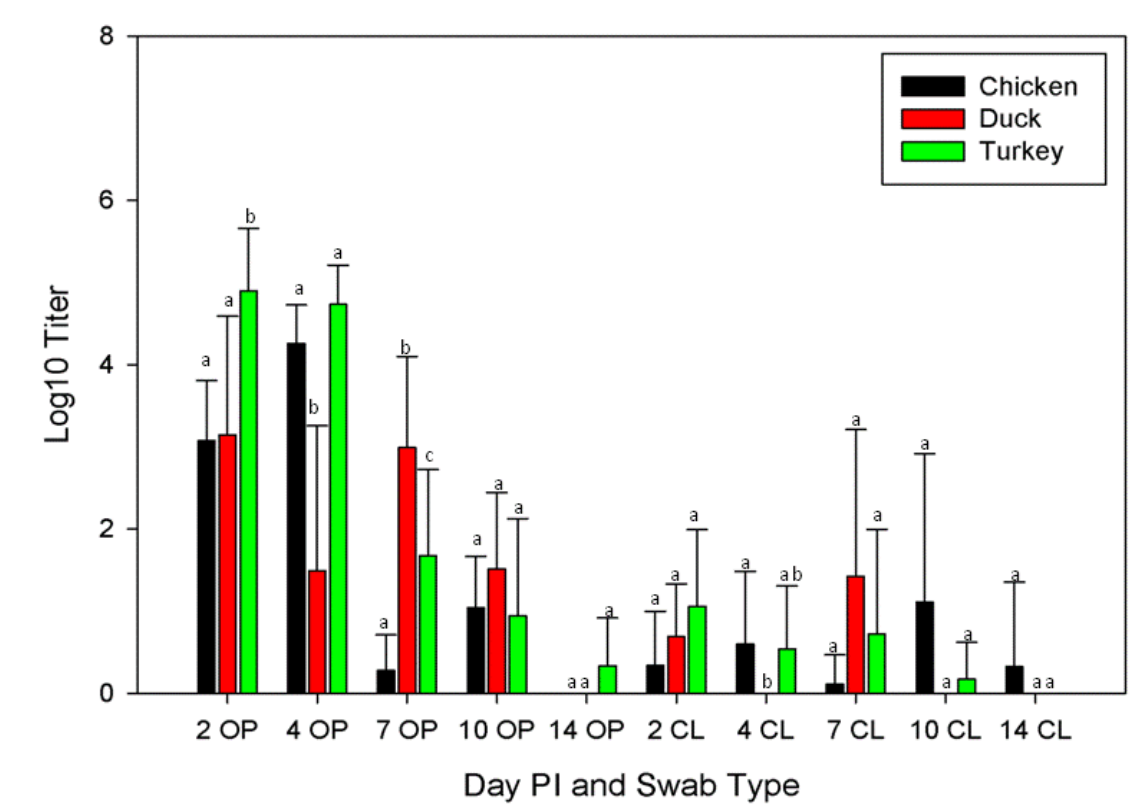

Mallard/OH/421/1987

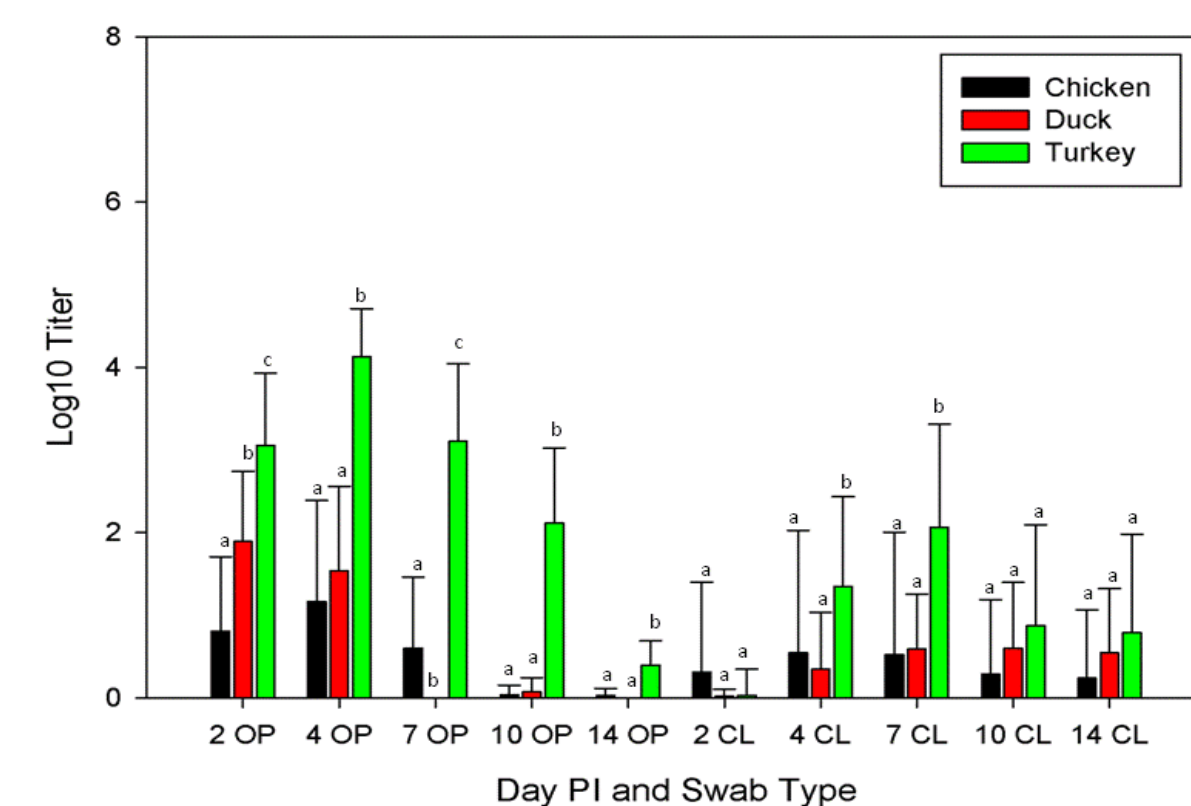

Pintail/MN/423/1999

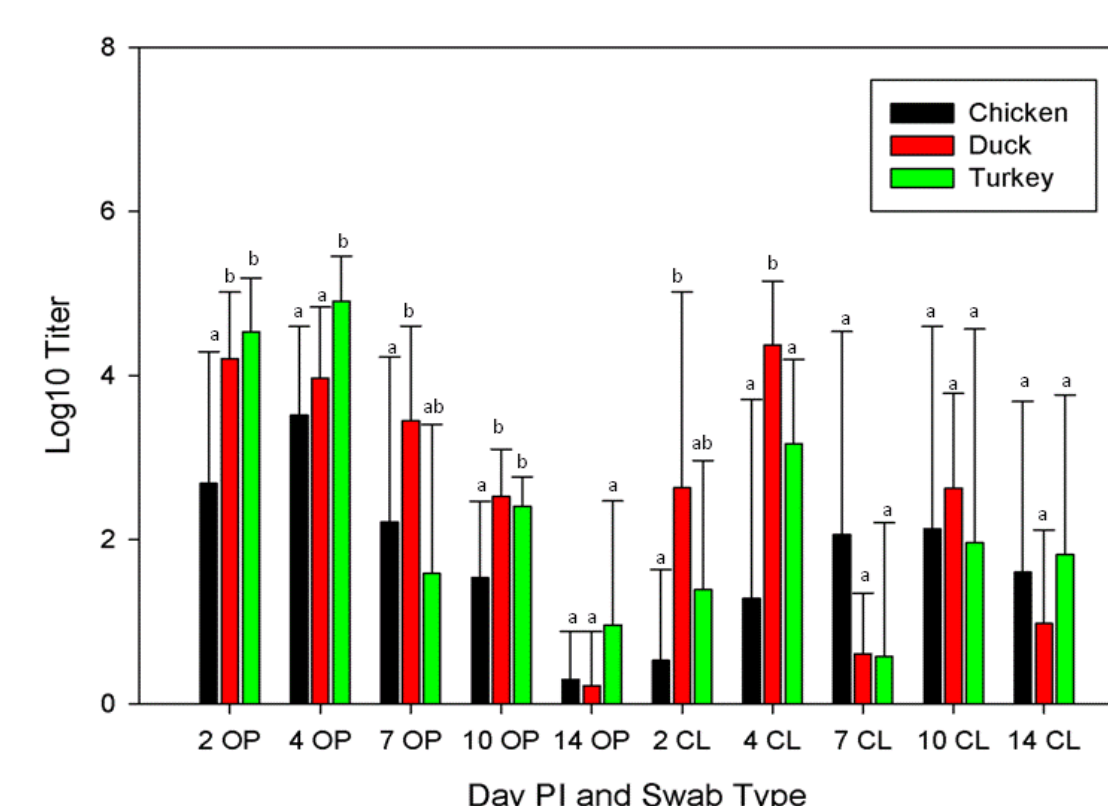

RuddyTurnstone/DE/1538/2000

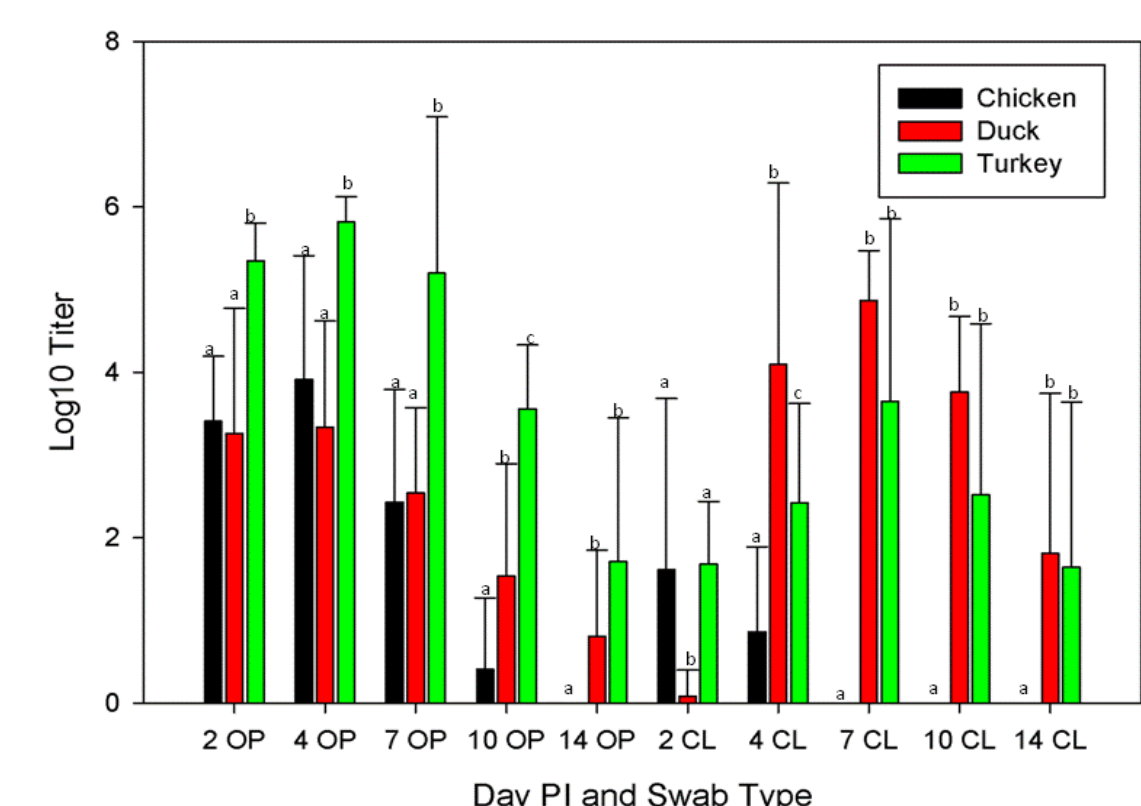

Supplement: MOESM5 [file 9609090]
